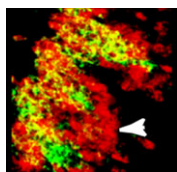

### Sniffing out sensory maps

The development of sensory maps – neural representations of the sense organs – involves the growth of sensory nerve axons into specific regions of the brain and the formation of precise synaptic connections. On p. 2398, Jean-François Cloutier and colleagues investigate the molecular mechanism that underlies the coalescence of vomeronasal sensory neuron (VSN) axons into discrete synaptic units, termed glomeruli, in the mouse accessory olfactory bulb (AOB), which is involved in processing signals that control social and sexual interactions. The researchers report that the transmembrane proteins Kirrel2 and Kirrel3 are differentially expressed in subpopulations of VSNs and show that Kirrel3 expression is required for the coalescence of axons into glomeruli. Specifically, the posterior AOB in *Kirrel3*<sup>-/-</sup> mice contains fewer, larger glomeruli than the AOB of wild-type mice. Moreover, *Kirrel3*<sup>-/-</sup> mice display reduced male-male aggression. The researchers propose, therefore, that differential expression of Kirrels on VSN axons generates a molecular code that is required for the proper coalescence of these axons into glomeruli within the AOB.

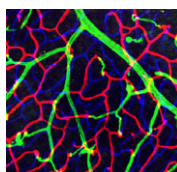

### Tip-top role for SRF in angiogenesis

The evolutionarily conserved transcription factor SRF (serum response factor) is involved in several developmental processes that require cell migration, including embryonic angiogenesis. Here (p. 2321), Zhenlin Li and colleagues investigate the function of SRF during postnatal angiogenesis. They show that the inducible, endothelial-specific deletion of *Srf* in postnatal mice reduces postnatal growth and viability, induces systemic hypovascularisation and retinal angiopathy, and decreases angiogenesis in implanted tumours. Genetic mosaic analysis indicates that defective filopodia formation by the tip cells of angiogenic sprouts and reduced cell contractility are the primary causes of these angiogenic defects. The researchers also show that VEGFA induces nuclear accumulation of myocardin-related transcription factors (MRTFs; co-factors that regulate the transcriptional output of SRF) and that MRTF-SRF activity controls the expression of contractility genes that are important for endothelial cell migration. The researchers conclude that SRF regulates tip cell invasive behaviour during sprouting angiogenesis and hypothesize that curbing pathological angiogenesis by targeting the SRF pathway might restrict tumour growth.

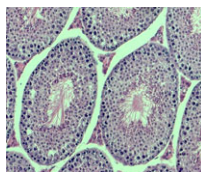

### Pygopus, chromatin and Wnt signalling

The mouse genome contains two genes for Pygopus (Pygo), which was identified as a Wnt signalling component in *Drosophila*. All Pygo proteins contain a conserved plant homology domain (PHD) that allows them to bind di- and trimethylated lysine 4 on histone H3, but is histone binding required for Pygo to function in Wnt signalling? To investigate this question, Konrad Basler and colleagues have generated mice homozygous for a *Pygo2* mutation that abolishes chromatin binding (p. 2377). Surprisingly, *Pygo2*-chromatin binding is not needed to maintain *Pygo2* function during mouse development, and abrogation of the *Pygo2*-chromatin interaction has little effect on Wnt signalling-related transcription during tissue homeostasis. Compromised *Pygo2*-chromatin binding leads to male sterility, however, and the researchers report that PHD-dependent recruitment of Pygo to regulatory regions in the testes is important for the recruitment of the histone acetylase Gcn5 to chromatin. These results identify a testis-specific role for *Pygo2* as a chromatin remodeller that is unrelated to its role as a modulator of Wnt signalling.

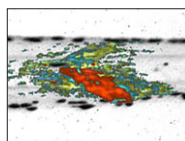

### Tumours and embryos tread the same path

Tumour cells share many characteristics with embryonic cells and it is thought that they acquire these characteristics through activation of developmental pathways. On p. 2354, Leonard Zon and co-workers develop a screening strategy to look for pathways that are common to embryogenesis and tumorigenesis in zebrafish. The researchers first evaluate gene expression in transgenic zebrafish embryos that express an inducible mutated *RAS* gene – *RAS* family members are the most commonly mutated oncogenes in human cancers and the *RAS* pathway is a key developmental pathway during embryogenesis. The researchers then use one of the genes that is upregulated by *RAS* expression to screen for small molecules that interfere with *RAS* signalling during embryogenesis. Finally, they show that two of the retrieved inhibitors suppress the growth of a zebrafish *KRAS*-induced embryonal rhabdomyosarcoma and of an *NRAS*-induced human rhabdomyosarcoma cell line. Together, these results demonstrate that common pathways are activated by *RAS* during embryogenesis and tumorigenesis and establish zebrafish embryos as a platform for anti-cancer drug discovery.

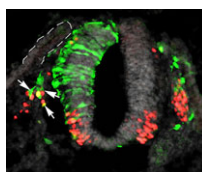

### Neural crest segregation out-Foxed

Fate segregation of multipotent progenitors is a key developmental process. The neural crest, which generates numerous cell types, is an ideal system in which to investigate this process. On p. 2269, Chaya Kalcheim and co-workers investigate when and how neurogenic and melanogenic neural crest cells segregate. Previously, the researchers reported that, even before emigration from the neural tube, neural but not melanocyte progenitors express the transcription factors *Foxd3*, *Sox9* and *Snail2*. Now, they show that avian melanocytes are initially part of the *Foxd3*-positive premigratory epithelium but downregulate *Foxd3* before emigration from the neural tube. If *Foxd3* downregulation is prevented, avian melanocyte progenitors fail to upregulate the melanogenic marker *Mitf* and the guidance receptor *Ednrb2*. Consistent with these data, loss of *Foxd3* function in mouse neural crest results in ectopic melanogenesis in the dorsal tube and sensory ganglia. The researchers propose, therefore, that *Foxd3* is part of a dynamically expressed network of neural tube genes that regulates the segregation of neurogenic and melanogenic neural crest cells.

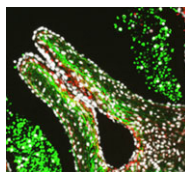

### Elastic fibres form early in human cardiac valves

Cardiac semilunar valves, which stop blood leaking back into the heart, contain an elastic fibre network that is essential for their physiological function. Histochemical studies suggest that this network, which contains elastin, fibrillins, linking proteins such as fibulins, and fibronectin, is not crucial for early human cardiac valve development. Here (p. 2345), Katja Schenke-Layland and colleagues challenge this assumption by systematically analysing elastogenesis in human semilunar valves. The researchers report that the transcription of genes essential for elastic fibre formation starts early within the first trimester of pregnancy. Using immunohistochemistry, they show that fibronectin, fibrillins and linking proteins are present at the onset of cardiac cushion formation (about week 4 of development) and that tropoelastin/elastin protein expression is first detectable in the valves at about week 7 of pregnancy, the stage of development when the embryo's blood pressure and heartbeat increase. Together, these findings suggest that elastogenesis is important for the development of functional semilunar valves.

Jane Bradbury
